# Supplementary material
Source: Springer Nature journal article supplement (https://www.springermedizin.de/resource/supplementary/13063_2012_1321_MOESM3_ESM.pdf/9619406)
Supplement: MOESM3 [file 9619406]

# Diagnosis of CHD

Randomisation 1:1 to CT scan or Standard Care

Known CHD? Yes

Ensure on appropriate secondary prevention

No

Standard care

CT Scan Arm

Obstructive CHD

Non-obstructive but significant CHD

No significant CHD

10 year CVD Risk  $\geq 20\%$ ?  
No Yes

Letter to patient, primary care physician and consultant  
Low risk of CVD

Letter to primary care physician and consultant  
Increased risk of CVD  
Lifestyle advice and primary prevention

Letter to primary care physician and consultant  
Significant CHD  
Lifestyle advice and secondary prevention

Letter to patient, primary care physician and consultant  
No evidence of significant CHD

Follow-up for 5 years:  
Cardiovascular death or non-fatal myocardial infarction
